# Supplementary material for: A CENP-S/X complex assembles at the centromere in S and G2 phases of the human cell cycle
Source: PubMed Central journal article supplement (PMC3938055; doi:10.1098/rsob.130229), 2014-02-12
Supplement: rsob130229supp1.pdf [file rsob130229supp1.pdf]

Supplementary Figure S1

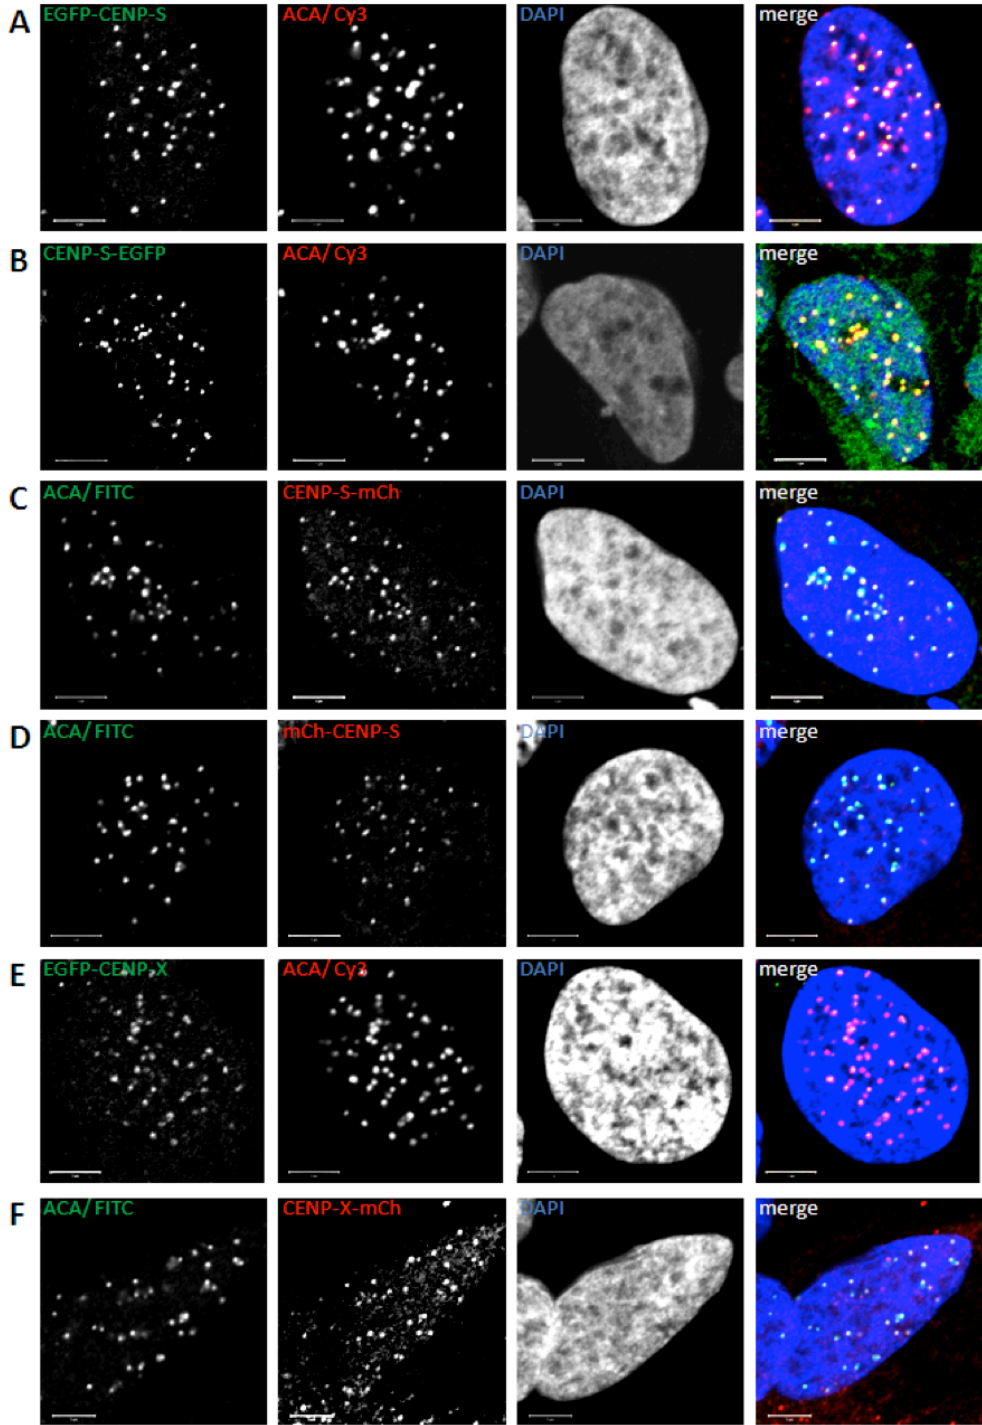

Figure S1. **CENP-FP constructs target to centromeres irrespective of site of tagging.** FP-CENP and CENP-FP constructs were transfected into U2OS cells and counterstained with anti-centromere antibody (ACA) in the appropriate color channel. A) EGFP-CENP-S; B) CENP-S-EGFP; C) CENP-S-mCh; D) mCh-CENP-S; E) EGFP-CENP-X; F) CENP-X-mCh. Scale bar equals 5 microns.

Supplementary Figure S2

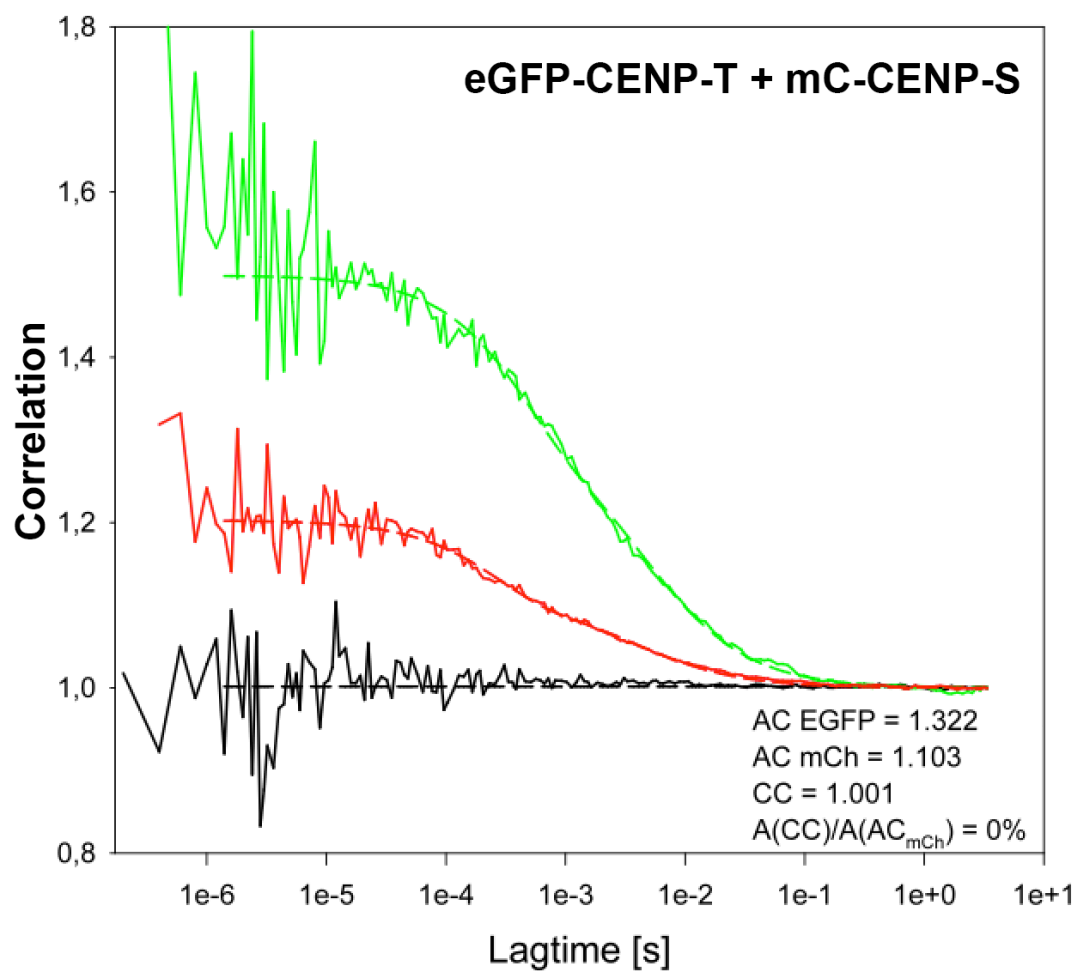

Figure S2. **FCCS analysis of CENP-T and CENP-S.** EGFP-CENP-T and mCh-CENP-S were co-expressed and analyzed as in Figure 1. Correlation spectra for EGFP-CENP-T (green) and mCh-CENP-S (red) show no cross-correlation (black).

Supplementary Figure S3

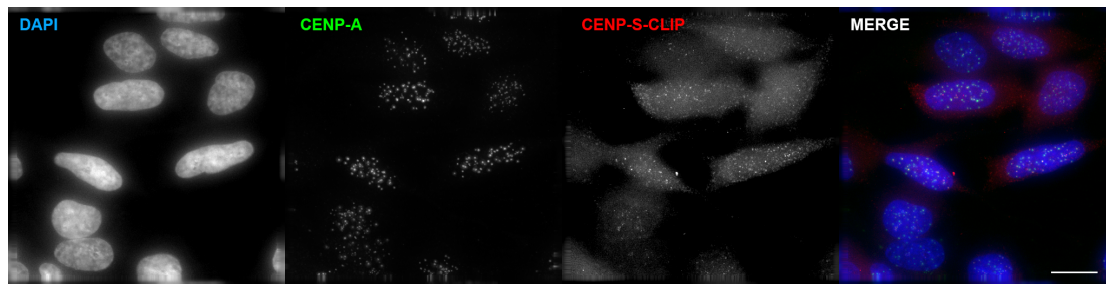

Figure S3. **CLIP-505 labeling of CENP-S-CLIP.** Asynchronous cells were fixed and immunostained for CENP-A (green in merge). Cells were also labelled with CLIP-505 to reveal CENP-S localization (red in merge). DNA was stained with DAPI (blue). Scale bar equals 10 microns.

Supplementary Figure S4

Supplementary Figure S4

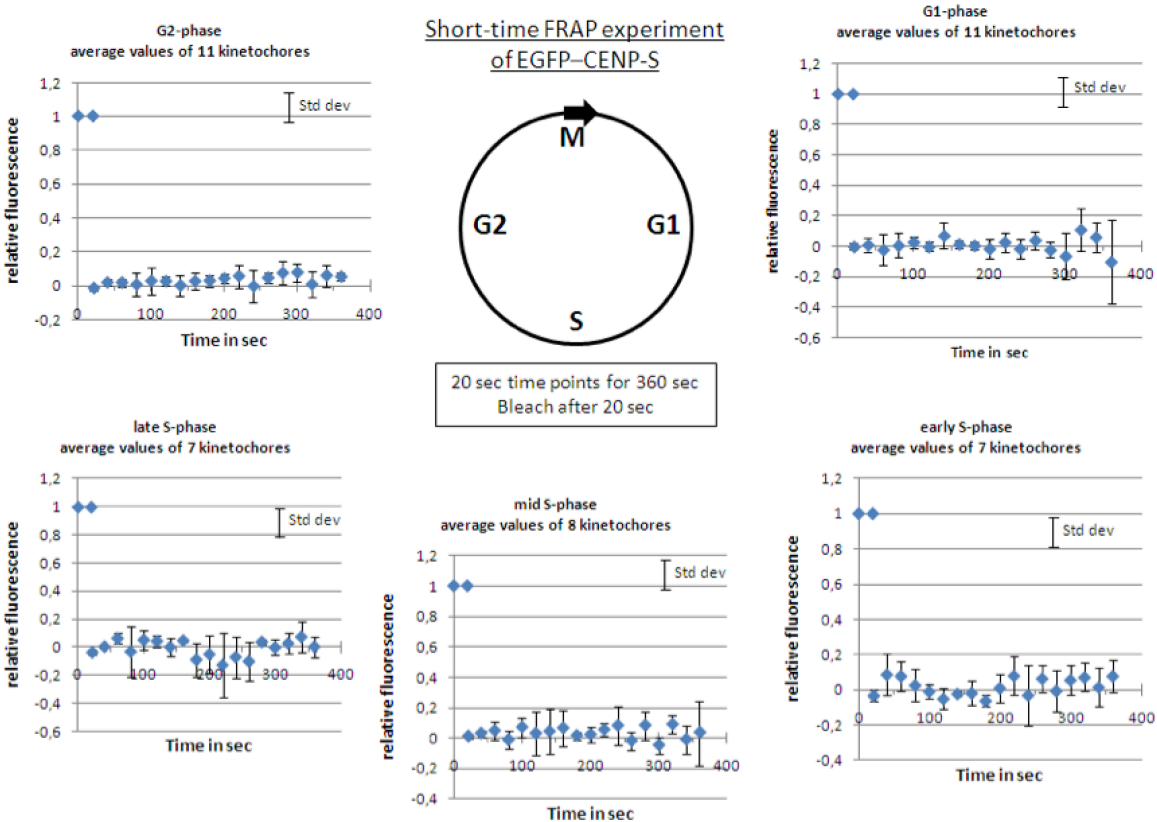

Figure S4. **Short term FRAP with EGFP-CENP-S.** Short-term FRAP with EGFP-CENP-S at different cell cycle stages. HeLa cells expressing mRFP-PCNA were transiently transfected with EGFP-CENP-S and cells were staged on the basis of PCNA pattern and nuclear size. At each stage, the indicated number of kinetochores were examined in at least 3 cells. Data are reported as the mean with standard deviations. No significant recovery in a 360 second time course was observed.

Supplementary Figure S5

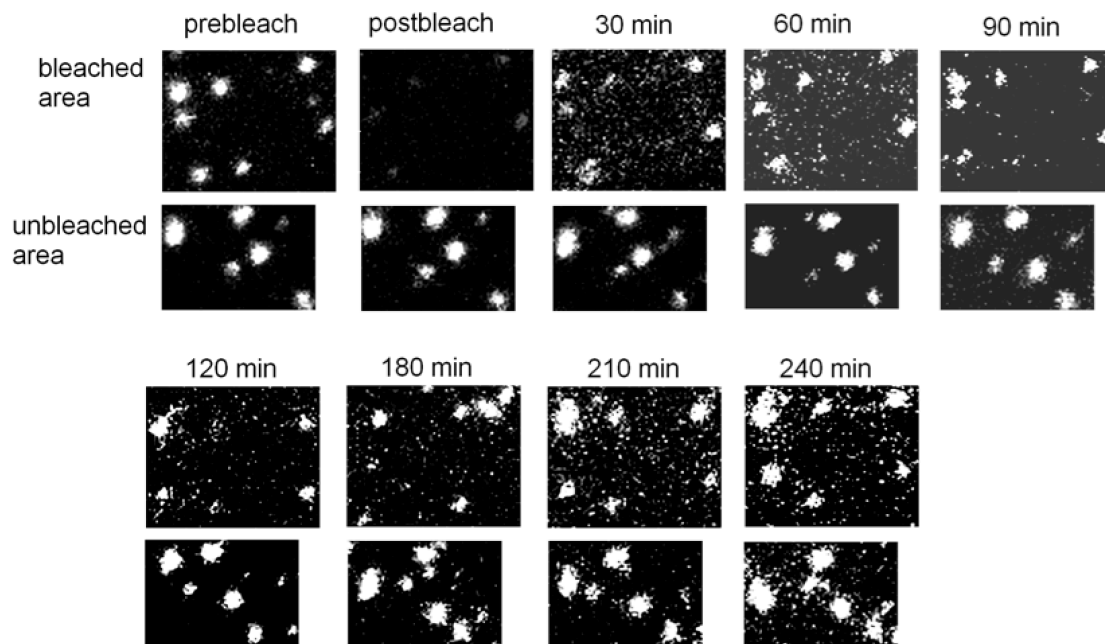

Figure S5. **Example of long-term CENP-S-EGFP FRAP recovery at centromeres.** FRAP analysis in a G1 cell is presented. Two small fields are shown at each of a series of time points, containing equivalent kinetochore numbers. The upper field was bleached at the indicated time and images were collected at consecutive 30 minute intervals. The lower field is a control, unbleached region. Recovery approaches 100% in the bleached zone.

Supplementary Figure S6

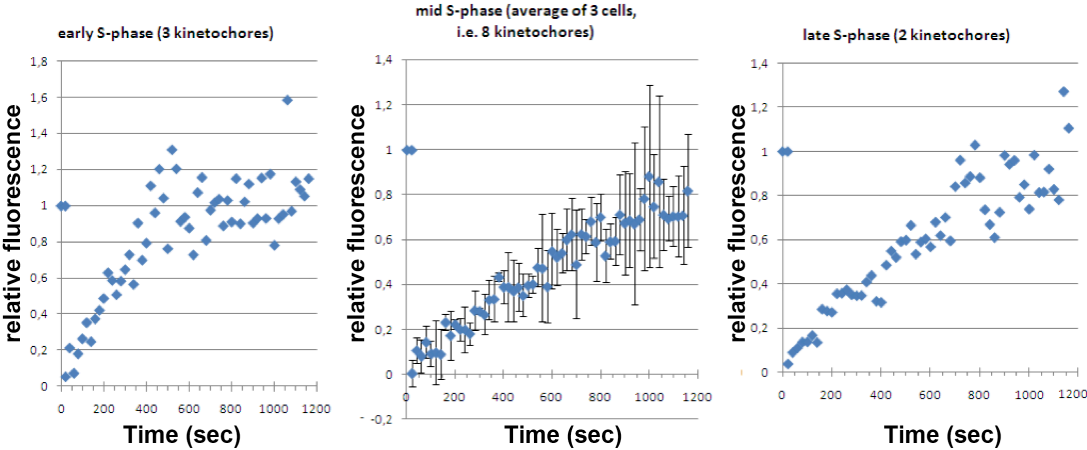

Figure S6. **FRAP with CENP-X.** HeLa cells expressing mRFP-PCNA were transiently transfected with EGFP-CENP-X and cells were staged in S-phase on the basis of PCNA pattern and nuclear size. FRAP was performed as described on the indicated number of kinetochores. CENP-X recovery was rapid and approached 100%.

Supplementary Table 1: Primers used

| Primer Set             | Sense Primer,                                                                                  | Antisense Primer,                                            | Product                     |
|------------------------|------------------------------------------------------------------------------------------------|--------------------------------------------------------------|-----------------------------|
| CENP-A <sub>RT</sub>   | CGCTTCCTCCCATCAACAC                                                                            | GGGCAGCTTCCTTATCAAGAG                                        | qPCR product                |
| CENP-B <sub>RT</sub>   | GAAGCCAGTGCCTACTC                                                                              | TCCTCATCATCATCGTCGTCTT                                       | qPCR product                |
| CENP-C <sub>RT</sub>   | AGTGAATCCAGTCCCATTGTTAG                                                                        | TCATCCTCTATCAACTTCGTATCAT                                    | qPCR product                |
| CENP-S <sub>RT</sub>   | CGCAGTGATGGAGGAGGAG                                                                            | CGCAAAGACAACCCACAGTAT                                        | qPCR product                |
| CENP-X <sub>RT</sub>   | CCTCCTGGCCACATTCCTG                                                                            | GATTTATTGATGTTGCTTTGTGAGAA                                   | qPCR product                |
| Cyclin A <sub>RT</sub> | ACAGCCAGACATCACTAACAG                                                                          | CAGCACTGACATGGAAGACA                                         | qPCR product                |
| Cyclin B <sub>RT</sub> | AGCAAGCAGTCAGACCAAAAT                                                                          | CAGTCAATTAGGATGGCTCTCA                                       | qPCR product                |
| CENP-R                 | GGGGACAAGTTTGTACAAAAAAGCAGGCTTCGA<br>AAACCTGTATTTTCAGGGCGCCACCATGGGCAT<br>GCCTGTAAAAGATCACTGAA | GGGGACCACCTTTGTACAAGAAAGCTGGGTG<br>TTTAAAAATGGCTTTAAGGAATTCA | Full length CDS             |
| CENP-S                 | GGGGACAAGTTTGTACAAAAAAGCAGGCTTCGA<br>AAACCTGTATTTTCAGGGCGCCACCATGGAGGA<br>GGAGGCGGAGAC         | GGGGACCACCTTTGTACAAGAAAGCTGGGT<br>ATTCTCACTTTCCACCCTCCAGC    | Full length CDS             |
| CENP-T                 | GGGGACAAGTTTGTACAAAAAAGCAGGCTTCGA<br>AAACCTGTATTTTCAGGGCGCCACCATGGCTGA<br>CCACAACCCCTGAC       | GGGGACCACCTTTGTACAAGAAAGCTGGGTC<br>TGGGCAGGGAAGACAGAGTT      | Full length CDS             |
| CENP-X                 | GGGGACAAGTTTGTACAAAAAAGCAGGCTTCGA<br>AAACCTGTATTTTCAGGGCGCCACCATGGAGGG<br>AGCAGGAGCTGGAT       | GGGGACCACCTTTGTACAAGAAAGCTGGGTG<br>AAGTCCAGGAGCAGCTGCC       | Full length CDS             |
| CENP-S<br>D92-138      | GGGGACAAGTTTGTACAAAAAAGCAGGCTTCGA<br>AAACCTGTATTTTCAGGGCGCCACCATGGAGGA<br>GGAGGCGGAGAC         | GGGGACCACCTTTGTACAAGAAAGCTGGGTT<br>GAATTACTCTCCTGGCTAAGAGC   | N terminal HFD of<br>CENP-S |

Supplementary Table 2: Antibodies used.

| Reactivity            | Species    | Conjugation | IF    | WB       | Supplier     |
|-----------------------|------------|-------------|-------|----------|--------------|
| CENP-A                | Mouse IgG  |             | 1/300 | 1/1000   | Abcam        |
| CENP-B                | Mouse IgG  |             | -     | 1/250    | W.Earnshaw   |
| CENP-S                | Rabbit IgG |             | -     | 1/500    | W.Wang       |
| CENP-X                | Rabbit IgG |             | -     | 1/500    | W.Wang       |
| CENP-T                | Rabbit IgG |             | -     | 1/1000   | Bethyl Labs  |
| CENP-W                | Rabbit IgG |             | -     | 1/1000   | Abcam        |
| Cyclin B              | Mouse IgG  |             | -     | 1/2000   | Upstate      |
| Histone H3S10P        | Rabbit IgG |             | -     | 1/2000   | Millipore    |
| PCNA                  | Human IgG  |             | 1/100 | -        | KF.Sullivan  |
| Zwint                 | Rabbit IgG |             | 1/100 | -        | Bethyl       |
| Secondary antibodies: |            |             |       |          |              |
| Anti-Rabbit IgG       | Donkey     | Cy5         | 1/200 | -        | Jackson Labs |
| Anti-Mouse IgG        | Goat       | TRITC       | 1/100 | -        | Jackson Labs |
| Anti-Human IgG        | Donkey     | AMCA        | 1/100 | -        | Jackson Labs |
| Anti-Rabbit IgG       | Goat       | HRP         | -     | 1/10,000 | Jackson Labs |
| Anti-Mouse IgG        | Goat       | HRP         | -     | 1/10,000 | Jackson Labs |

Supplementary Table 3: Summary of F2H results

| RFP \ GFP | CENP-A | CENP-M | CENP-R | CENP-S | CENP-T |
|-----------|--------|--------|--------|--------|--------|
| CENP-A    | -      | -      | -      | -      | -      |
| CENP-M    | -      | -      | +-     | -      | -      |
| CENP-R    | -      | +-     | -      | +      | -      |
| CENP-S    | -      | -      | +      | -      | ++     |
| CENP-T    | -      | -      | -      | ++     | -      |

- ++ denotes strong interaction
- + denotes detectable interaction
- +- denotes weak interaction
- denotes undetectable interaction
